# Supplementary material
Source: MDPI journal article supplement (https://www.mdpi.com/1996-1073/16/2/661)
Supplement: s1 [file s1]

# Assessing the Future wind Energy Potential in Portugal Using a CMIP6 Model Ensemble and WRF High-Resolution Simulations

## Supplementary Material

### WS CMIP6 Historical / ERA5 Median Differences

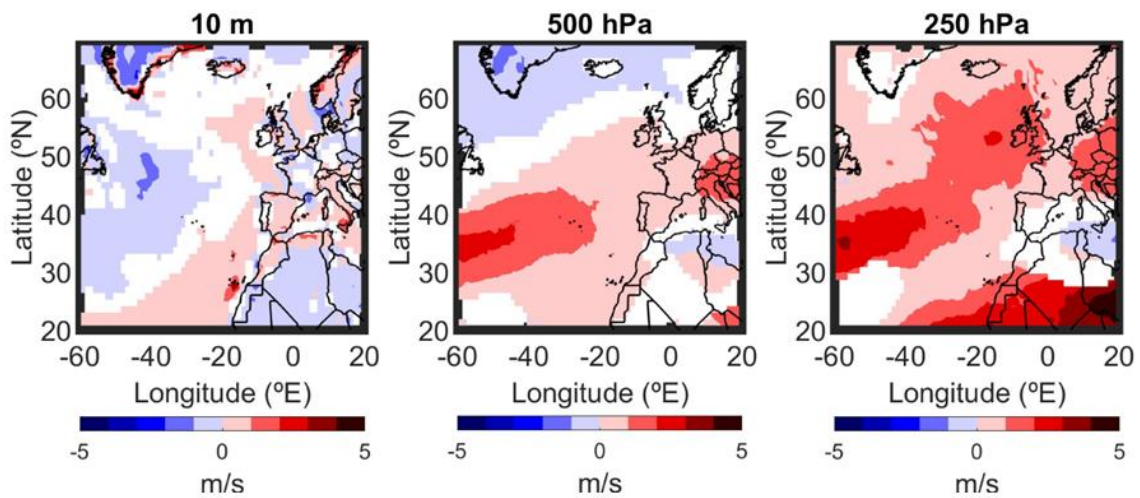

**Figure S1.** Wind speed (WS, m/s) median differences between the CMIP6 ensemble and ERA5 data for 1995–2014, at 10 m (left), 500 hPa (middle) and 250 hPa (right) levels.

### WS CMIP6 Historical / ERA5 Overlap Percentage

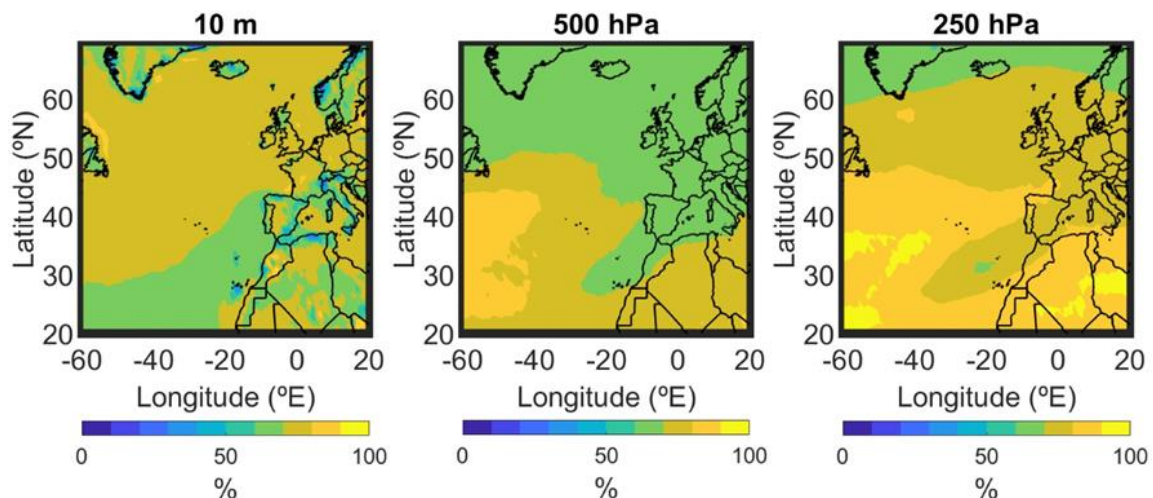

**Figure S2.** Wind speed (WS) overlap percentage (OP, %) between the CMIP6 ensemble and ERA5 data for 1995–2014, at 10 m (left), 500 hPa (middle) and 250 hPa (right) levels.

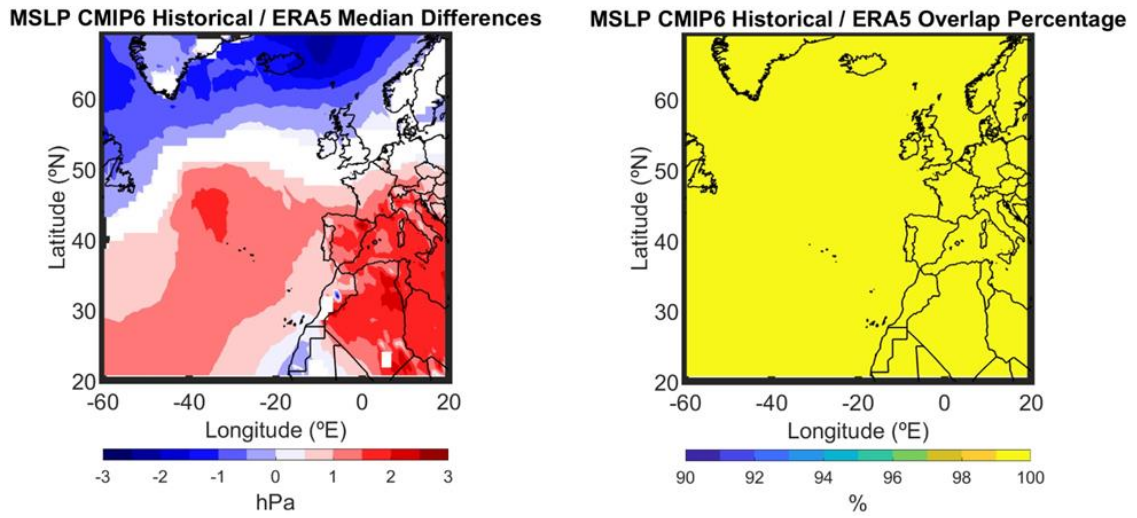

**Figure S3.** Sea level pressure (SLP, hPa) median differences (left side) and overlap percentage (OP, %, right side) between the CMIP6 ensemble and ERA5 data for 1995–2014.

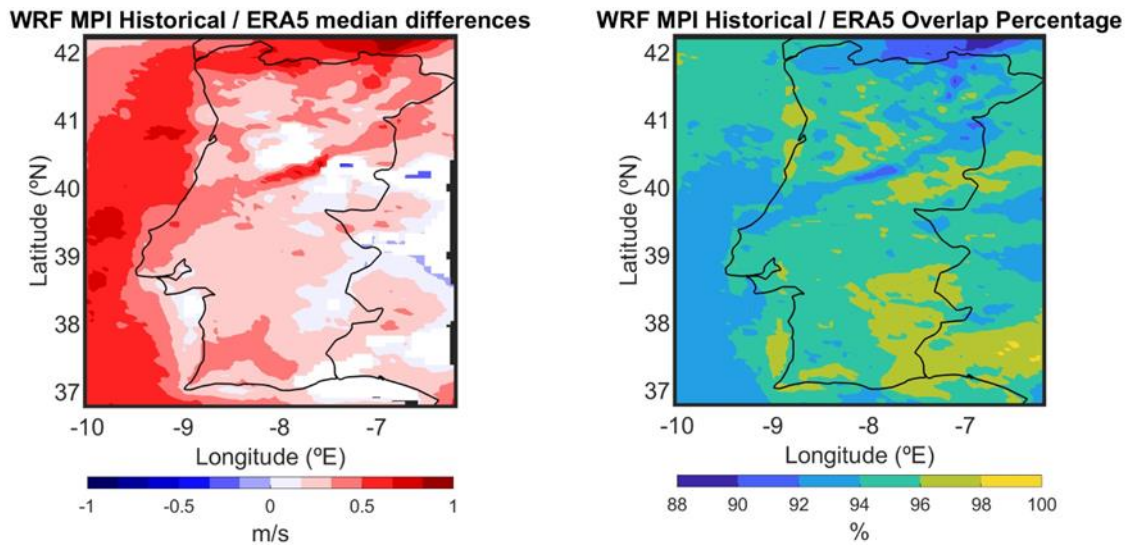

**Figure S4.** Wind speed (WS, m/s) median differences (left side) and overlap percentage (OP, %, right side) between the WRF MPI-based and ERA5-based simulations for 1995–2014.

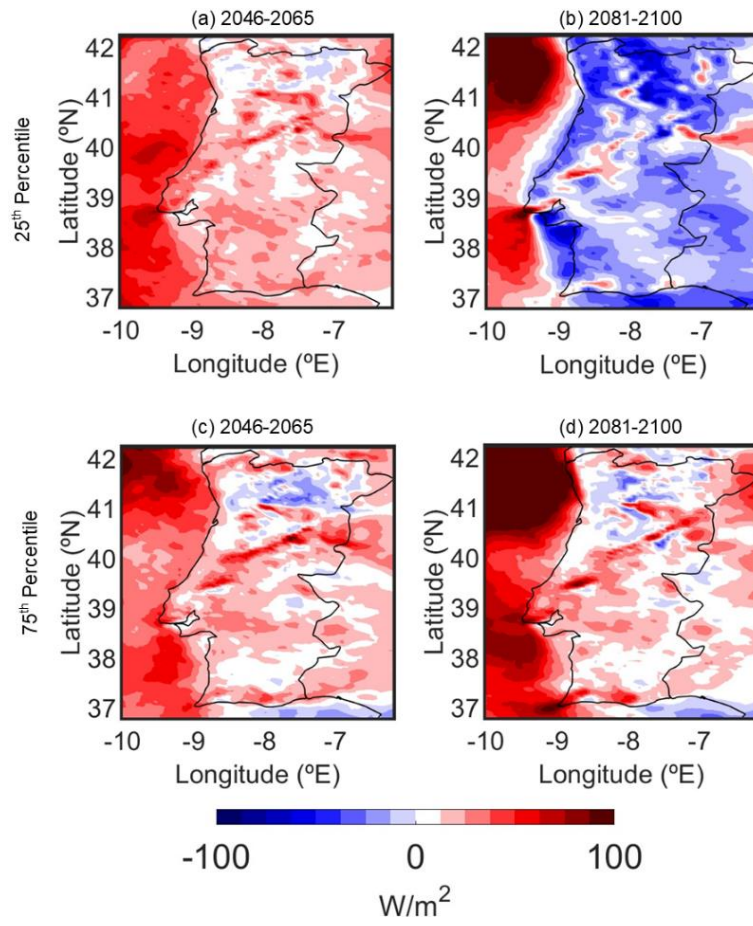

**Figure S5.** 25th and 75th percentile absolute anomalies of annual mean 100 m WPD ( $\text{W/m}^2$ ) for (a, c) 2046–2065 and (b, d) 2081–2100, under SSP5-8.5, relatively to 1995–2014.
